# Supplementary material for: Anthropogenic Reversal of the Natural Ozone Gradient betweenNorthern and Southern Mid-latitudes
Source: Copernicus journal article supplement (doi:10.5194/acp-2020-1198), 2021-01-07
Supplement: Supplementary file 1 [file acp-2020-1198-supplement.pdf]

## Supporting Information

### Text S1. Model-measurement comparison of annual mean ozone concentrations in 2000

530 Figures S3 and S4 show comparisons between observations and model simulations of annual mean ozone concentrations in 2000 at 13 baseline sites (10 in the NH and 3 in the SH). These concentrations are derived from quadratic fits to the measurements and model results over the complete measurement records and the 1985-2014 model results. The absolute values of the CMIP6 model simulations are improved over the CMIP5 simulations, with similar spatial correlation. The more recent simulations overestimate the observations by an average of 3.5 ppb, with the individual mean model offsets varying between

535 -1 and +9 ppb, while the earlier results overestimated annual mean ozone by 4 to 13 ppb (average overestimate of 9 ppb). This CMIP5 model assessment is consistent with the overestimates previously found at the NH baseline sites (Parrish et al., 2014), and the closer agreement found in the SH (Cooper et al., 2014; Parrish et al., 2016). Turnock et al. (2020) compare five of these same CMIP6 model simulations to observations from the TOAR database, and also find comparable model overestimates of ozone at rural sites in the NH.

540

**Table S1.** Monthly and annual average baseline ozone concentrations at the U.S. Pacific Coast MBL.

| year | Jan   | Feb   | Mar   | Apr   | May   | June  | July  | Aug   | Sep   | Oct   | Nov   | Dec   | annual |
|------|-------|-------|-------|-------|-------|-------|-------|-------|-------|-------|-------|-------|--------|
| 1987 |       |       |       |       |       |       |       |       |       |       | 33.50 | 28.93 |        |
| 1988 | 32.06 | 31.45 | 38.30 | 40.08 | 36.26 | 24.92 | 19.70 | 21.85 | 29.96 | 25.09 | 31.84 | 25.64 | 29.76  |
| 1989 | 28.16 | 32.33 | 32.77 | 34.19 | 34.32 | 29.09 | 21.86 | 25.18 | 34.37 | 32.68 | 30.94 | 28.38 | 30.36  |
| 1990 | 29.54 | 30.96 | 34.88 | 30.39 | 32.11 | 24.66 | 22.55 | 21.90 | 28.84 | 31.05 | 28.39 | 29.89 | 28.76  |
| 1991 | 30.29 | 30.50 | 36.63 | 39.53 | 35.74 | 28.99 | 22.07 | 21.83 | 27.31 | 31.41 | 28.85 | 27.41 | 30.05  |
| 1992 | 27.50 | 33.50 | 32.85 | 36.75 | 35.11 | 26.75 | 21.47 | 24.34 | 26.84 | 31.30 | 26.92 | 29.19 | 29.38  |
| 1993 | 28.46 | 34.59 | 31.87 | 34.60 | 33.13 | 26.33 | 22.52 | 24.85 | 25.60 | 28.36 | 31.21 | 31.84 | 29.45  |
| 1994 | 30.29 | 33.00 | 37.21 | 37.42 | 34.11 | 27.20 | 20.56 | 22.88 | 23.06 | 32.45 | 32.56 | 29.83 | 30.05  |
| 1995 | 31.75 | 35.89 | 40.87 | 40.08 | 34.57 |       |       |       | 30.81 | 30.79 | 32.31 | 33.09 |        |
| 1996 | 32.50 | 32.33 | 36.75 | 36.83 | 37.34 |       |       |       | 29.00 | 29.67 | 26.55 | 31.83 |        |
| 1997 | 34.20 | 31.07 | 39.13 | 40.86 | 35.93 |       |       |       | 14.09 |       | 35.80 | 29.92 |        |
| 1998 | 31.38 | 32.25 | 36.82 | 37.73 | 31.20 |       |       |       | 29.04 | 31.88 |       | 32.94 |        |
| 1999 | 27.50 | 36.88 | 38.09 | 38.33 | 34.41 |       |       |       | 27.69 | 33.13 | 32.00 | 33.26 |        |
| 2000 | 34.74 |       | 38.41 | 39.61 | 41.79 |       |       |       | 30.11 | 26.07 | 39.14 |       |        |
| 2001 | 34.60 | 29.67 | 41.39 | 41.30 | 40.04 |       |       |       | 27.58 | 33.63 | 30.44 | 37.23 |        |
| 2002 | 36.63 | 36.45 | 29.52 | 29.20 | 24.69 | 21.73 | 23.46 | 26.24 | 24.71 | 27.24 | 23.70 | 27.84 | 27.62  |
| 2003 | 27.15 | 33.23 | 40.70 | 46.44 | 42.51 | 36.63 | 25.89 | 29.02 | 29.50 | 30.86 | 33.81 | 35.27 | 34.25  |
| 2004 | 37.71 | 36.83 | 40.42 | 39.70 | 36.71 | 34.40 | 25.21 | 24.92 | 33.01 | 32.28 | 31.25 | 33.97 | 33.87  |

---

|      |       |       |       |       |       |       |       |       |       |       |       |       |       |
|------|-------|-------|-------|-------|-------|-------|-------|-------|-------|-------|-------|-------|-------|
| 2005 | 30.66 | 35.61 | 41.93 | 44.25 | 38.27 | 32.60 | 25.45 | 25.32 | 29.51 | 29.79 | 35.25 | 33.41 | 33.50 |
| 2006 | 41.95 | 39.13 | 44.92 | 42.41 | 42.21 | 34.24 | 26.16 | 29.47 | 29.96 | 34.58 | 41.54 | 33.61 | 36.68 |
| 2007 | 33.24 | 39.33 | 40.83 | 44.04 | 41.91 | 31.89 | 24.61 | 27.81 | 33.78 | 30.92 | 34.73 | 37.00 | 35.01 |
| 2008 | 37.51 | 35.51 | 42.11 | 45.74 | 40.19 | 32.64 | 25.45 | 23.36 | 30.81 | 31.44 | 30.11 | 34.92 | 34.15 |
| 2009 | 30.37 | 40.67 | 41.52 | 43.58 | 35.14 | 29.60 | 24.25 | 25.12 | 30.17 | 31.58 | 32.59 | 32.09 | 33.06 |
| 2010 | 35.92 | 33.82 | 40.90 | 43.13 | 38.48 | 29.29 | 24.46 | 24.75 | 24.50 | 32.96 | 31.31 | 40.88 | 33.37 |
| 2011 | 26.71 | 34.32 | 37.71 | 41.27 | 39.95 | 28.93 | 20.34 | 23.40 | 26.38 | 28.22 | 31.85 | 25.89 | 30.41 |
| 2012 | 27.24 | 33.69 | 40.26 | 37.34 | 37.05 | 26.56 | 22.64 | 24.13 | 28.97 | 30.58 | 30.61 | 34.84 | 31.16 |
| 2013 | 32.57 | 33.83 | 34.26 | 38.08 | 34.60 | 24.89 | 22.10 | 20.71 | 25.78 | 26.38 | 29.89 | 30.17 | 29.44 |
| 2014 | 28.07 | 30.88 | 31.61 | 33.18 | 31.47 | 24.28 | 19.29 | 18.64 | 22.87 | 23.83 | 28.13 | 29.76 | 26.83 |
| 2015 | 22.55 | 29.94 | 32.93 | 36.68 | 34.90 | 24.50 | 20.75 | 19.13 | 22.90 | 24.50 | 28.67 | 31.77 | 27.44 |
| 2016 | 37.99 | 29.06 | 34.98 | 35.03 | 30.38 | 24.82 | 18.12 | 17.87 | 18.80 | 23.46 | 31.96 | 29.55 | 27.67 |
| 2017 | 29.86 | 36.89 | 35.80 |       |       |       |       |       |       |       |       |       |       |

---

545 **Table S2.** References for model descriptions and citations for the simulation results from the ESMs that participated in the CMIP6 exercise, and were used in this analysis.

| <b>Model</b> | <b>Reference</b>                                                 | <b>Data Citation</b>                                                                                                                                                                                                                                              |
|--------------|------------------------------------------------------------------|-------------------------------------------------------------------------------------------------------------------------------------------------------------------------------------------------------------------------------------------------------------------|
| BCC-ESM1     | Wu et al., 2019; 2020                                            | Zhang et al., 2018; 2019                                                                                                                                                                                                                                          |
| CESM2-WACCM  | Emmons et al., 2020; Gettelman et al., 2019; Tilmes et al., 2019 | Danabasoglu, 2019a; 2019b; 2019c                                                                                                                                                                                                                                  |
| GFDL-ESM4    | Dunne, 2020; Horowitz, 2020                                      | Horowitz et al., 2018; John et al., 2018; Krasting et al., 2018                                                                                                                                                                                                   |
| GISS-E2-1-H  | Bauer et al., 2020                                               | GISS, NASA Goddard Institute for Space Studies (NASA/GISS) (2019). NASA-GISS GISS-E2-1-H model output prepared for CMIP6 CMIP amip. Earth System Grid Federation. <a href="https://doi.org/10.22033/ESGF/CMIP6.1421">https://doi.org/10.22033/ESGF/CMIP6.1421</a> |
| MRI-ESM2-0   | Yukimoto et al., 2019a; Oshima et al., 2020                      | Yukimoto et al., 2019b                                                                                                                                                                                                                                            |
| UKESM1-0-LL  | Sellar et al., 2019; Archibald et al., 2020b                     | Good et al., 2019; Tang et al., 2019                                                                                                                                                                                                                              |

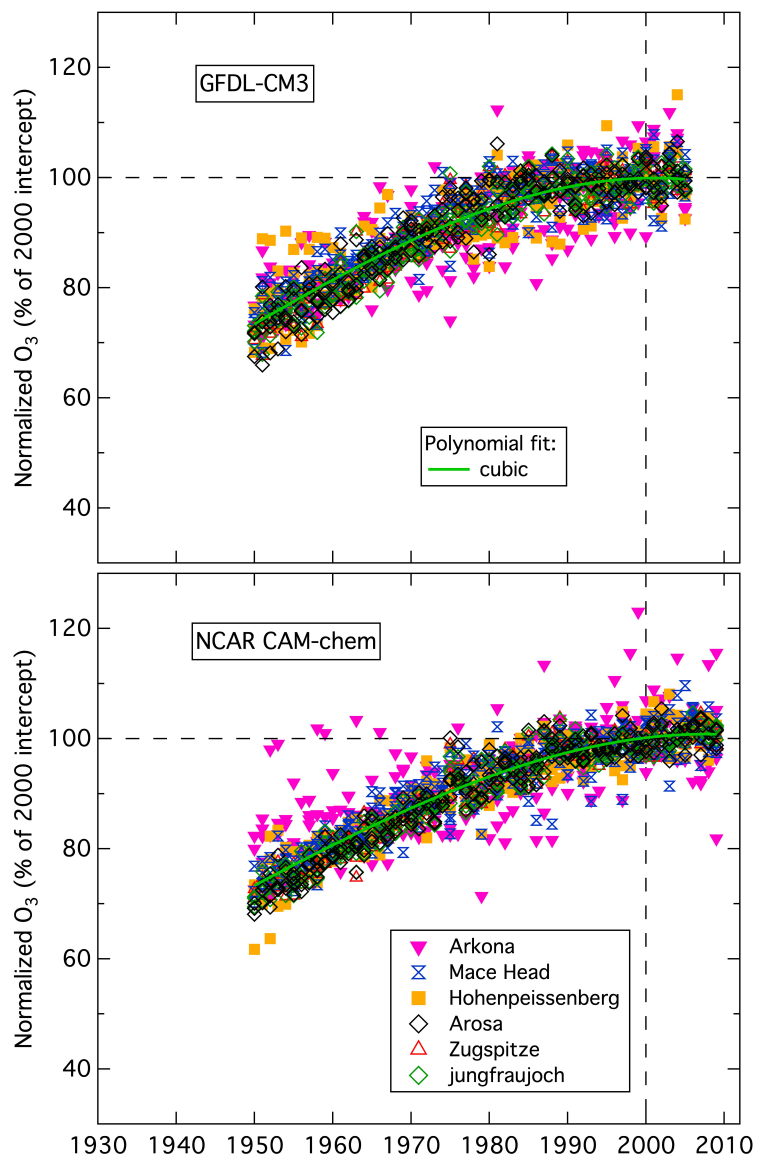

**Figure S1.** Normalized, seasonal mean ozone simulated at the six baseline representative European sites considered by Parrish et al. (2014). The simulations are from the GFDL-CM3 (upper panel) and NCAR CAM-chem (lower panel) models. Each graph includes cubic polynomial fits (green curves) to all seasonal means.

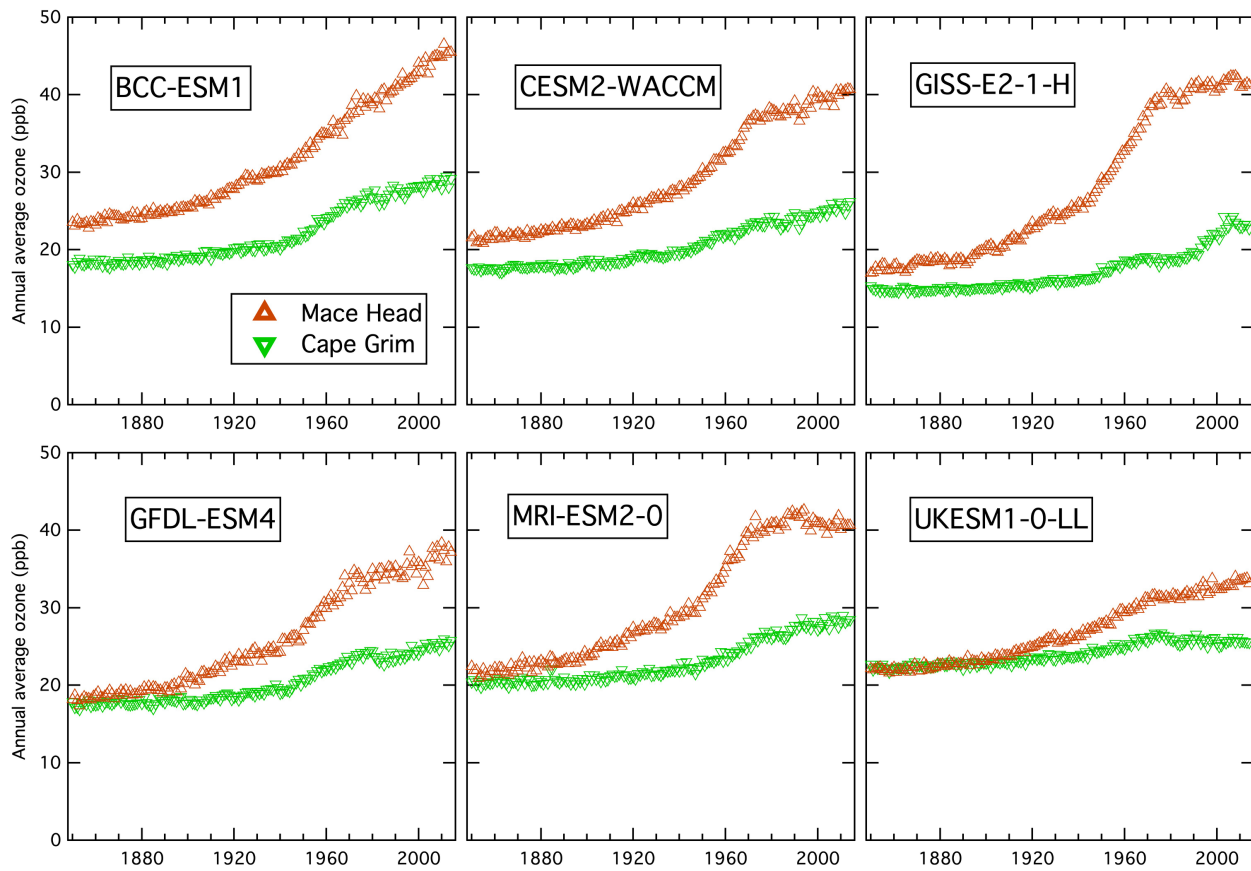

**Figure S2.** Simulated long-term changes in annual mean ozone mixing ratios at Mace Head, Ireland and Cape Grim, Australia from 1850-2014. The results are from six ESMs (identified in the annotations) that participated in the CMIP6 exercise.

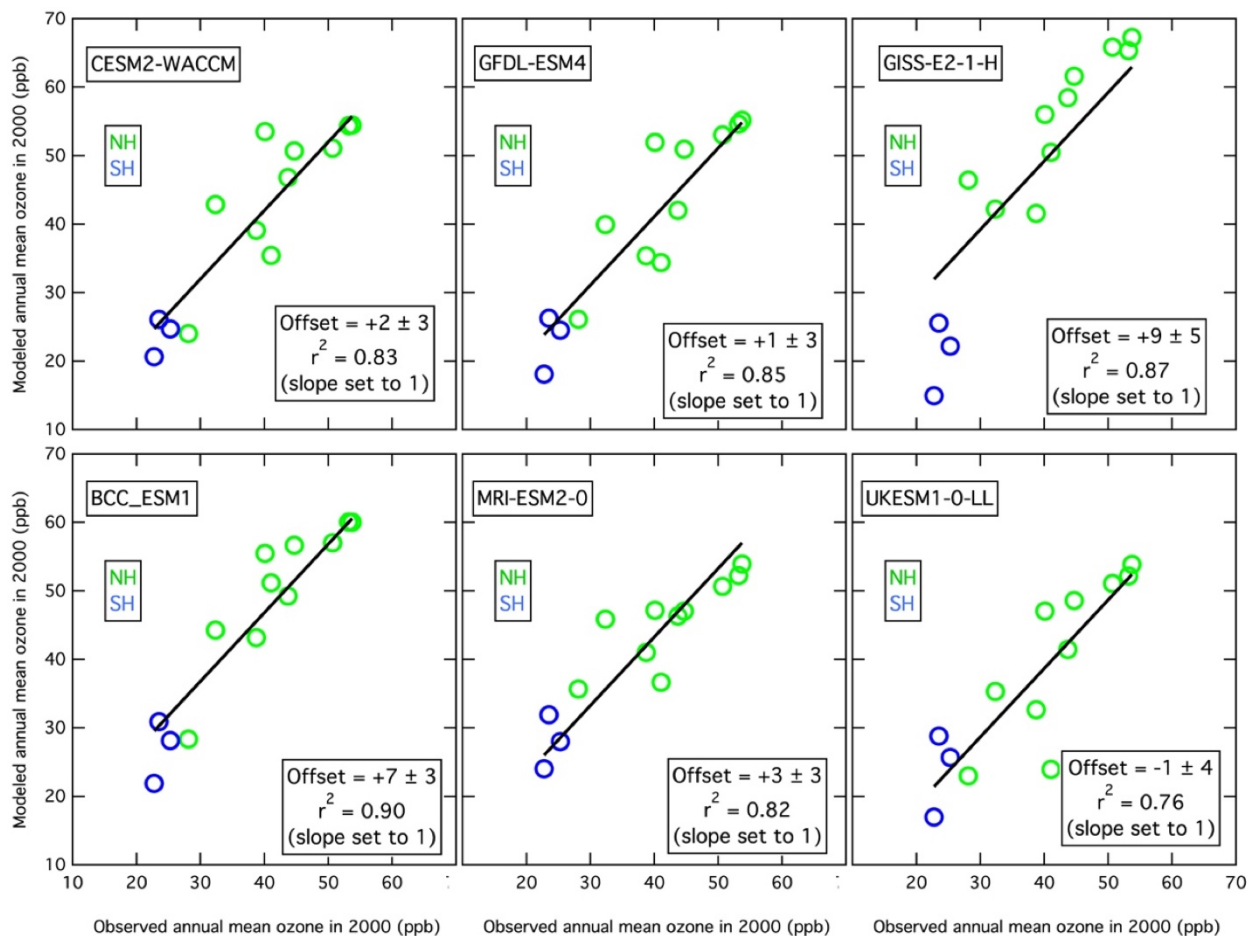

555 **Figure S3.** Model-measurement comparison of mean annual ozone in 2000 at 10 NH (green symbols) and 3 SH (blue symbols) baseline sites. The simulations are results from six ESMs (identified in the annotations) that participated in the CMIP6 exercise. Annotations give the square of the linear correlation coefficient and the offset with 95% confidence interval between the simulations and observations calculated; the offset is calculated from a standard linear regression with the slope held at unity. The baseline sites are the 10 NH surface sites discussed by Parrish et al., 2012; 2014, and the 3 SH mid-latitude sites discussed  
 560 by Cooper et al. 2014 (Cape Point, South Africa; Cape Grim, Australia; and Ushuaia, Argentina).

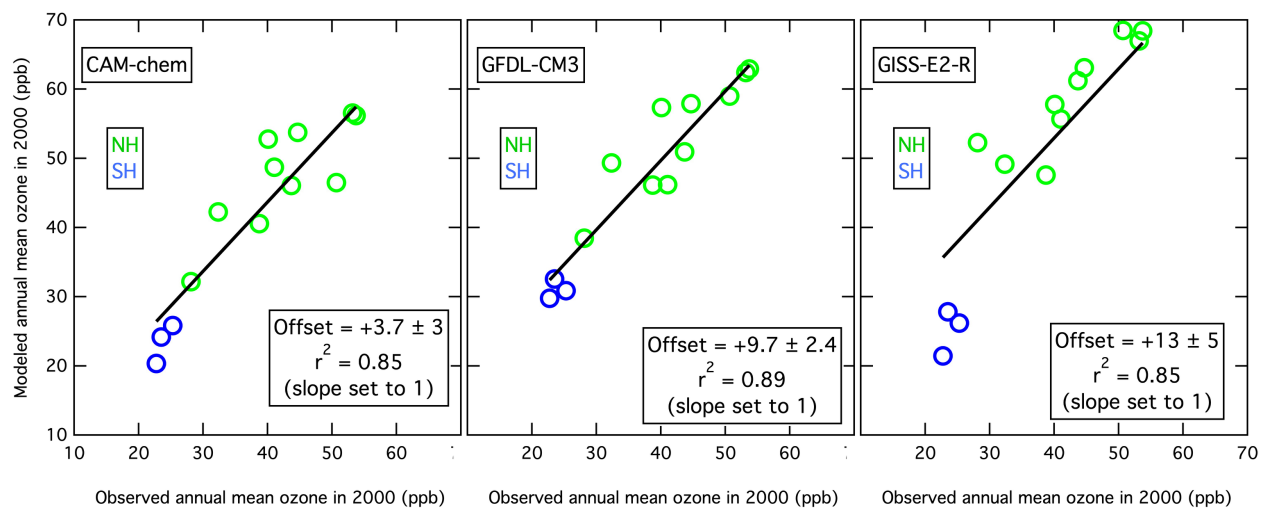

**Figure S4.** Model-measurement comparison of mean annual ozone in 2000 at 10 NH and 3 SH baseline sites identified in the caption of Figure S3. The simulations are the results from three CCMs (identified in the annotations) that participated in the CMIP5 exercise. Annotations give the square of the linear correlation coefficient and the offset with 95% confidence interval between the simulations and observations; the offset is calculated from a standard linear regression with the slope held at unity.
